# Supplementary material for: Bacmid Expression of Granulovirus Enhancin En3 Accumulates in Cell Soluble Fraction to Potentiate Nucleopolyhedrovirus Infection
Source: MDPI journal article supplement (doi:10.3390/v13071233), 2021-06-25
Supplement: s1 [file s1]

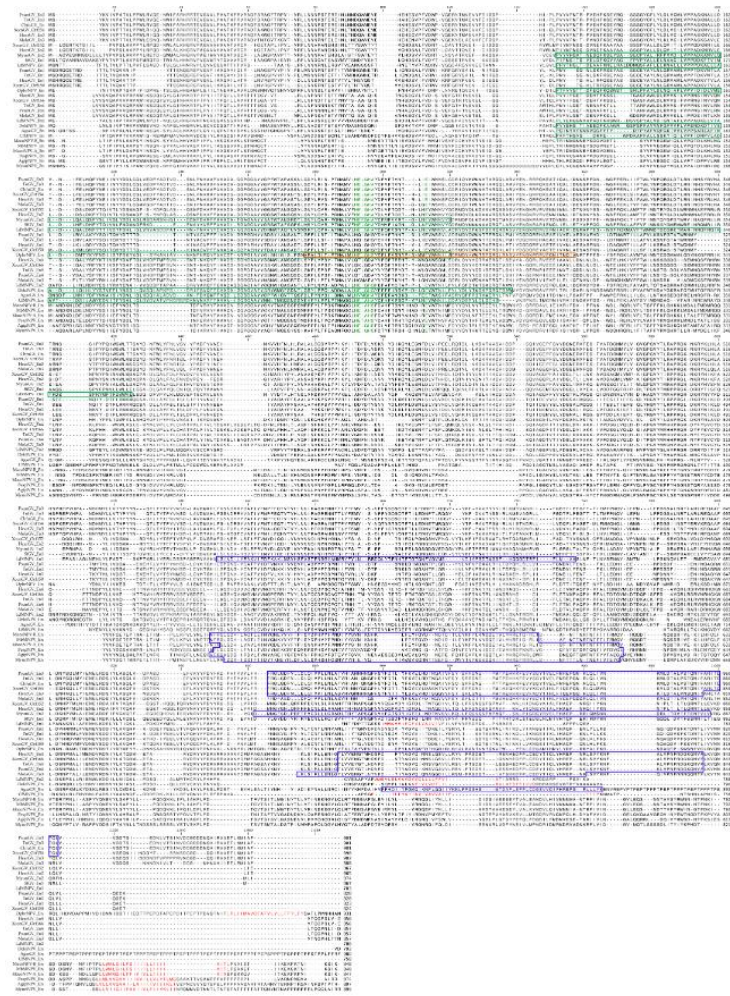

**Figure S1.** Global alignment of enhancin proteins. The HEXXH(8,28)E motif is represented with light green residues. The transmembrane helices are represented in red residues. The Peptidase\_M60 Superfamily, the SsIE\_AcFD\_Zn\_LP and Mucin\_bdg super family domains are shown in green, orange, and blue boxes, respectively.
